# Supplementary material for: Barriers and Facilitators on the HIV Care Continuum: a Scoping Review Protocol
Source: Research Square preprint supplement (doi:10.21203/rs.3.rs-174330/v1), 2021-02-09
Supplement: Supplementary file 1 [file c0d47a54af446ddc036db044.docx]

**Supplemental material 1. MEDLINE search strategy**

| **Query** | **Filters** |
| --- | --- |
| (("care continuum"[Title/Abstract] OR "continuity of care"[Title/Abstract] OR "continuity of patient care"[Title/Abstract] OR "access to care"[Title/Abstract] OR "health service accessibility"[Title/Abstract] OR "linkage to care"[Title/Abstract] OR "treatment initiation"[Title/Abstract] OR "time-to-treatment"[Title/Abstract] OR "engagement in care"[Title/Abstract] OR "medication adherence"[Title/Abstract] OR "treatment adherence"[Title/Abstract] OR "treatment adherence and compliance"[Title/Abstract] OR "retention in care"[Title/Abstract] OR "lost to follow-up"[Title/Abstract] OR "Continuity of Patient Care"[MeSH terms] OR "Health Services Accessibility"[MeSH terms] OR "Time-to-treatment"[MeSH terms] OR "Medication Adherence"[MeSH terms] OR "Treatment Adherence and Compliance"[MeSH terms] OR "Retention in Care"[MeSH terms] OR "Lost to Follow-Up"[MeSH terms]) AND (HIV[Title/Abstract] OR AIDS[Title/Abstract] OR "Acquired Immunodeficiency Syndrome"[Title/Abstract] OR "HIV"[MeSH Terms] OR "Acquired Immunodeficiency Syndrome"[MeSH Terms])) AND (barrier[Title/Abstract] OR facilitator[Title/Abstract] OR factor[Title/Abstract]) | Humans, English, Korean, Adult: 19+ years, from 2013 - 2021 |
